# Supplementary material
Source: HighWire-hosted journal article supplement (https://cmaj.ca/highwire/filestream/57730/field_highwire_adjunct_files/2/work-stiell-3-at.pdf)
Supplement: work-stiell-3-at.pdf [file work-stiell-3-at.pdf]

### Appendix 3 (as submitted by the authors)

| <b>Physician Interpretation Errors of the Canadian CT Head Rule for 909 Head Injury Patients During the 12-Month After Period at the Intervention Hospitals*</b> |                           |                   |                 |
|------------------------------------------------------------------------------------------------------------------------------------------------------------------|---------------------------|-------------------|-----------------|
| <b>Criteria</b>                                                                                                                                                  | <b>Number of Criteria</b> |                   | <b>% Errors</b> |
|                                                                                                                                                                  | <b>Missed</b>             | <b>Overcalled</b> |                 |
| <b>High Risk (for Neurosurgical Intervention)</b>                                                                                                                |                           |                   | <b>10.6%</b>    |
| GCS score < 15 at 2 hours after injury                                                                                                                           | 29                        | 23                | 5.7%            |
| Suspected open or depressed skull fracture                                                                                                                       | 2                         | 3                 | 0.6%            |
| Any sign of basal skull fracture                                                                                                                                 | 7                         | 7                 | 1.5%            |
| Vomiting • 2 episodes                                                                                                                                            | 14                        | 3                 | 1.9%            |
| Age • 65 years                                                                                                                                                   | 11                        | 7                 | 2.0%            |
| <b>Medium Risk (for Brain Injury on CT)</b>                                                                                                                      |                           |                   | <b>11.8%</b>    |
| Amnesia before impact • 30 min                                                                                                                                   | 8                         | 5                 | 1.4%            |
| Dangerous mechanism                                                                                                                                              | 27                        | 71                | 10.8%           |

\*Decision rule could be interpreted for 909 patients for whom the data collection sheet was completed.
